# Supplementary material for: Adsorption of Azo-Dye Orange II from Aqueous Solutions Using a Metal-Organic Framework Material: Iron- Benzenetricarboxylate
Source: PubMed Central journal article supplement (PMC5456435; doi:10.3390/ma7128037), 2014-12-12
Supplement: materials-07-08037-s001.pdf [file materials-07-08037-s001.pdf]

## Supplementary Materials

**Figure S1.** Kinetic models plots for the adsorption of Orange II on Fe-BTC at different initial concentrations, (a) pseudo-second-order kinetic model plot; (b) pseudo-first-order kinetic model plot. (adsorbent mass: 10 mg; temperature: 298 K; pH 7).

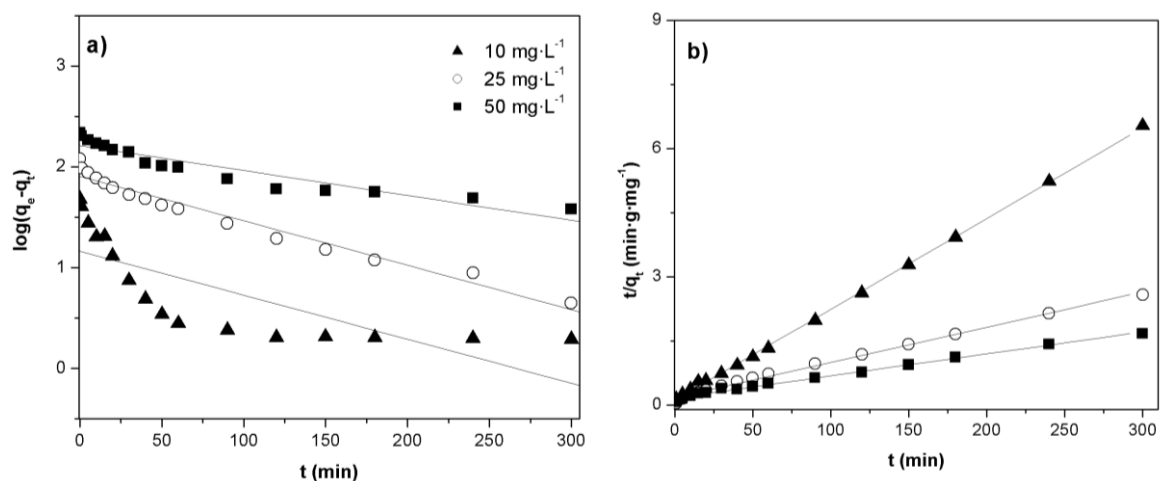

**Figure S2.** Kinetic models plots for the adsorption of Orange II on Fe-BTC at different initial concentrations, (a) pseudo-second-order kinetic model plot; (b) pseudo-first-order kinetic model plot. (adsorbent mass: 10 mg; temperature: 318 K; pH 7).

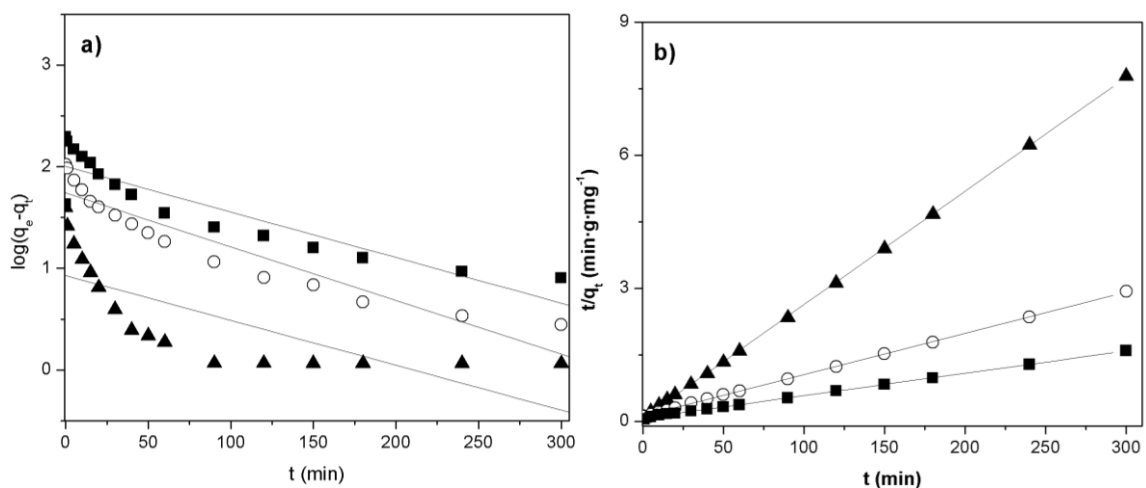

**Figure S3.** Intra-particle diffusion model plot of dye adsorbed on Fe(BTC). (Initial concentration:  $50 \text{ mg}\cdot\text{L}^{-1}$ ; adsorbent mass: 10 mg; temperature: 298 K and pH 7).

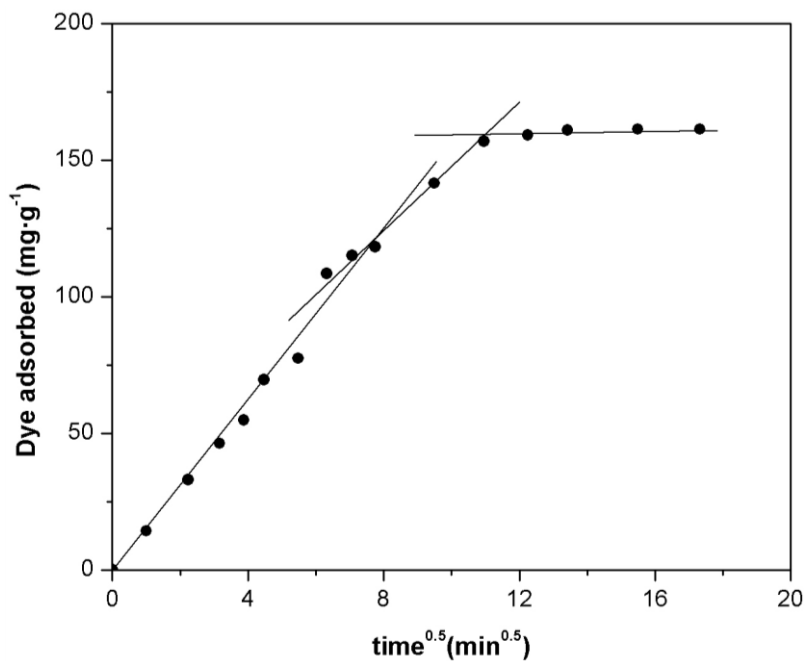

**Figure S4.** Intra-particle diffusion model plot of dye adsorbed on Fe(BTC). (Initial concentration:  $50 \text{ mg}\cdot\text{L}^{-1}$ ; adsorbent mass: 10 mg; temperature: 318 K and pH 7).

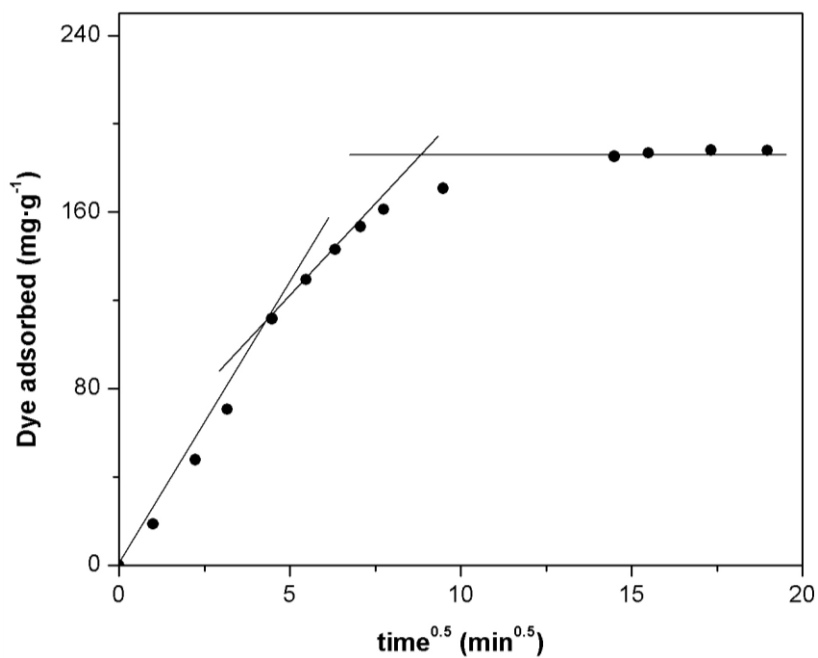

**Table S1.** Adsorbed amount ( $\text{mg}\cdot\text{g}^{-1}$ ) in the adsorption of Orange II dye over Fe(BTC) and activated carbon at different initial dye concentrations.

| Adsorbent        | Adsorbed amount ( $\text{mg}\cdot\text{g}^{-1}$ ) |        |        |
|------------------|---------------------------------------------------|--------|--------|
|                  | 10 ppm                                            | 25 ppm | 50 ppm |
| Fe(BTC)          | 43.98                                             | 115.49 | 212.49 |
| Activated carbon | 41.43                                             | 61.88  | 80.31  |

**Table S2.** Kinetic parameters for the adsorption of Orange II over Fe(BTC) at different concentrations and temperature.

| T<br>(°C) | $C_0$<br>( $\text{mg}\cdot\text{g}^{-1}$ ) | $q_{e,\text{exp}}$<br>( $\text{mg}\cdot\text{g}^{-1}$ ) | Pseudo-first-order                                   |                                                        |       | Pseudo-second-order                                  |                                                        |       |
|-----------|--------------------------------------------|---------------------------------------------------------|------------------------------------------------------|--------------------------------------------------------|-------|------------------------------------------------------|--------------------------------------------------------|-------|
|           |                                            |                                                         | $q_{e,\text{cal}}$ ( $\text{mg}\cdot\text{g}^{-1}$ ) | $k_1$ ( $\text{g}^{-1}\cdot\text{mg}\cdot\text{min}$ ) | $R^2$ | $q_{e,\text{cal}}$ ( $\text{mg}\cdot\text{g}^{-1}$ ) | $k_2$ ( $\text{g}^{-1}\cdot\text{mg}\cdot\text{min}$ ) | $R^2$ |
| 25        | 10                                         | 45.78                                                   | 21.69                                                | $2.21 \times 10^{-2}$                                  | 0.762 | 47.85                                                | $3.61 \times 10^{-3}$                                  | 0.997 |
|           | 25                                         | 116.02                                                  | 80.50                                                | $1.01 \times 10^{-2}$                                  | 0.967 | 120.48                                               | $4.36 \times 10^{-4}$                                  | 0.992 |
|           | 50                                         | 213.24                                                  | 132.25                                               | $5.75 \times 10^{-3}$                                  | 0.940 | 217.39                                               | $1.09 \times 10^{-4}$                                  | 0.997 |
| 35        | 10                                         | 43.96                                                   | 10.67                                                | $1.24 \times 10^{-2}$                                  | 0.617 | 44.8                                                 | $4.14 \times 10^{-3}$                                  | 0.999 |
|           | 25                                         | 115.49                                                  | 45.91                                                | $1.31 \times 10^{-2}$                                  | 0.820 | 117.1                                                | $1.46 \times 10^{-3}$                                  | 0.999 |
|           | 50                                         | 212.49                                                  | 91.94                                                | $1.08 \times 10^{-2}$                                  | 0.750 | 220.3                                                | $5.64 \times 10^{-4}$                                  | 0.999 |
| 45        | 10                                         | 38.51                                                   | 39.68                                                | $3.79 \times 10^{-2}$                                  | 0.862 | 39.68                                                | $8.35 \times 10^{-3}$                                  | 0.998 |
|           | 25                                         | 104.10                                                  | 53.48                                                | $5.52 \times 10^{-3}$                                  | 0.512 | 105.26                                               | $1.69 \times 10^{-3}$                                  | 0.998 |
|           | 50                                         | 187.90                                                  | 101.74                                               | $8.75 \times 10^{-3}$                                  | 0.853 | 196.08                                               | $1.03 \times 10^{-3}$                                  | 0.999 |
